# Supplementary material for: Tetrachloroethylene Exposure and Bladder Cancer Risk: A Meta-Analysis of Dry-Cleaning-Worker Studies
Source: PubMed Central journal article supplement (PMC4080536; doi:10.1289/ehp.1307055), 2014-03-21
Supplement: ehp.1307055.s001.pdf [file ehp.1307055.s001.pdf]

**Supplemental Material**

**Tetrachloroethylene Exposure and Bladder Cancer Risk: A Meta-  
Analysis of Dry-Cleaning-Worker Studies**

Jelle Vlaanderen, Kurt Straif, Avima Ruder, Aaron Blair, Johnni Hansen, Elsebeth Lynge,  
Barbara Charbotel, Dana Loomis, Timo Kauppinen, Pentti Kyyronen, Eero Pukkala, Elisabete  
Weiderpass, and Neela Guha

**Table S1.** Overview of studies excluded from the meta-analysis.

| <b>Sources</b>               | <b>Study design</b> | <b>Exposure category</b>                     | <b>Comments</b>                                                                                     |
|------------------------------|---------------------|----------------------------------------------|-----------------------------------------------------------------------------------------------------|
| Andersen et al. 1999         | cohort              | laundry and dry cleaning workers             | study population overlaps with (Pukkala et al. 2009), which includes a larger number of individuals |
| Aschengrau et al. 1993       | case-control        | exposure through contaminated drinking water | extent exposure to tetrachloroethylene is unclear                                                   |
| Boice et al. 1999            | cohort              | exposure to tetrachloroethylene              | superseded by (Lipworth et al. 2011)                                                                |
| Chang et al. 2005            | cohort              | workers employed in an electronics factory   | extent exposure to tetrachloroethylene is unclear                                                   |
| Duh and Asal 1984            | cohort              | laundry and dry cleaning workers             | reports standardized mortality odds ratios                                                          |
| Ji et al. 2005               | cohort              | laundry and dry cleaning workers             | study population overlaps with (Pukkala et al. 2009), which includes a larger number of individuals |
| Katz and Jowett 1981         | cohort              | laundry and dry cleaning workers             | reports proportionate mortality ratios                                                              |
| Lynge and Thygesen 1990      | cohort              | dry cleaning workers                         | study population overlaps with (Lynge et al. 2006), which included a larger number of individuals   |
| Mallin 1990                  | cluster analysis    | exposure through contaminated drinking water | extent exposure to tetrachloroethylene is unclear                                                   |
| Minder and Beer-Porizek 1992 | cohort              | laundry and dry cleaning workers             | reports proportionate mortality ratios                                                              |
| Nakamura 1985                | cohort              | laundry and dry cleaning workers             | reports proportionate mortality ratios                                                              |
| Reulen et al. 2008           | meta-analysis       | laundry and dry cleaning workers             | meta-analysis                                                                                       |

| <b>Sources</b>          | <b>Study design</b> | <b>Exposure category</b>           | <b>Comments</b>                                                                                                                                                                                                                         |
|-------------------------|---------------------|------------------------------------|-----------------------------------------------------------------------------------------------------------------------------------------------------------------------------------------------------------------------------------------|
| Schoenberg et al. 1984  | case-control        | dry cleaning workers               | study population overlaps with (Smith et al. 1985) and (Silverman et al. 1989), which both include a larger number of individuals. Launderers were included in this occupational category [personal communication with Debra Silverman] |
| Seldén and Ahlborg 2011 | cohort              | laundry and dry cleaning workers   | study population overlaps with (Pukkala et al. 2009), which includes a larger number of individuals                                                                                                                                     |
| Smith et al. 1985       | case-control        | laundry and dry cleaning workers   | study population overlaps with (Silverman et al. 1989, 1990)                                                                                                                                                                            |
| Sung et al. 2007        | cohort              | employee of an electronics factory | extent exposure to tetrachloroethylene is unclear                                                                                                                                                                                       |
| Swanson and Burns 1995  | case-control        | dry cleaning workers               | study population overlaps with (Burns and Swanson 1991), which includes a larger number of individuals                                                                                                                                  |
| Travier et al. 2002     | case-control        | laundry and dry cleaning workers   | study population overlaps with (Pukkala et al. 2009), which includes a larger number of individuals                                                                                                                                     |
| Walker et al. 1997      | cohort              | laundry and dry cleaning workers   | reports proportionate mortality ratios                                                                                                                                                                                                  |
| Wilson et al. 2008      | cohort              | laundry and dry cleaning workers   | study population overlaps with (Pukkala et al. 2009), which includes a larger number of individuals                                                                                                                                     |

## References

- Andersen A, Barlow L, Engeland A, Kjaerheim K, Lyng E, Pukkala E. 1999. Work-related cancer in the Nordic countries. *Scand. J. Work. Environ. Health* 25 Suppl 2:1–116.
- Aschengrau A, Ozonoff D, Paulu C, Coogan P, Vezina R, Heeren T, et al. 1993. Cancer risk and tetrachloroethylene-contaminated drinking water in Massachusetts. *Arch. Environ. Health* 48:284–92.
- Boice JD, Marano DE, Fryzek JP, Sadler CJ, McLaughlin JK. 1999. Mortality among aircraft manufacturing workers. *Occup. Environ. Med.* 56:581–97.
- Burns PB, Swanson GM. 1991. Risk of urinary bladder cancer among blacks and whites: the role of cigarette use and occupation. *Cancer Causes Control* 2:371–9.
- Chang Y-M, Tai C-F, Yang S-C, Lin RS, Sung F-C, Shih T-S, et al. 2005. Cancer incidence among workers potentially exposed to chlorinated solvents in an electronics factory. *J. Occup. Health* 47:171–80.
- Duh RW, Asal NR. 1984. Mortality among laundry and dry cleaning workers in Oklahoma. *Am. J. Public Health* 74:1278–80.
- Ji J, Granström C, Hemminki K. 2005. Occupation and bladder cancer: a cohort study in Sweden. *Br. J. Cancer* 92:1276–8.
- Katz RM, Jowett D. 1981. Female laundry and dry cleaning workers in Wisconsin: a mortality analysis. *Am. J. Public Health* 71:305–7.
- Lipworth L, Sonderman JS, Mumma MT, Tarone RE, Marano DE, Boice JD, et al. 2011. Cancer mortality among aircraft manufacturing workers: an extended follow-up. *J. Occup. Environ. Med.* 53:992–1007.
- Lyng E, Andersen A, Rylander L, Tinnerberg H, Lindbohm M-L, Pukkala E, et al. 2006. Cancer in persons working in dry cleaning in the Nordic countries. *Environ. Health Perspect.* 114:213–9.
- Lyng E, Thygesen L. 1990. Primary liver cancer among women in laundry and dry-cleaning work in Denmark. *Scand. J. Work. Environ. Health* 16:108–12.
- Mallin K. 1990. Investigation of a bladder cancer cluster in northwestern Illinois. *Am. J. Epidemiol.* 132:S96–106.
- Minder CE, Beer-Porizek V. 1992. Cancer mortality of Swiss men by occupation, 1979-1982. *Scand. J. Work. Environ. Health* 18 Suppl 3:1–27.
- Nakamura K. 1985. Mortality patterns among cleaning workers. *Sangyo Igaku.* 27:24–37.

- Pukkala E, Martinsen JI, Lynge E, Gunnarsdottir HK, Sparén P, Tryggvadottir L, et al. 2009. Occupation and cancer - follow-up of 15 million people in five Nordic countries. *Acta Oncol.* 48:646–790.
- Reulen RC, Kellen E, Buntinx F, Brinkman M, Zeegers MP. 2008. A meta-analysis on the association between bladder cancer and occupation. *Scand. J. Urol. Nephrol. Suppl.* 64–78.
- Schoenberg JB, Stenhagen A, Mogielnicki AP, Altman R, Abe T, Mason TJ. 1984. Case-control study of bladder cancer in New Jersey. I. Occupational exposures in white males. *J. Natl. Cancer Inst.* 72:973–81.
- Seldén AI, Ahlborg G. 2011. Cancer morbidity in Swedish dry-cleaners and laundry workers: historically prospective cohort study. *Int. Arch. Occup. Environ. Health* 84:435–43.
- Silverman DT, Levin LI, Hoover RN. 1990. Occupational risks of bladder cancer among white women in the United States. *Am. J. Epidemiol.* 132:453–61.
- Silverman DT, Levin LI, Hoover RN. 1989. Occupational risks of bladder cancer in the United States: II Nonwhite men. *J. Natl. Cancer Inst.* 81:1480–3.
- Smith EM, Miller ER, Woolson RF, Brown CK. 1985. Bladder cancer risk among laundry workers, dry cleaners, and others in chemically-related occupations. *J. Occup. Med.* 27:295–7.
- Sung T-I, Chen P-C, Jyuhn-Hsiarn Lee L, Lin Y-P, Hsieh G-Y, Wang J-D. 2007. Increased standardized incidence ratio of breast cancer in female electronics workers. *BMC Public Health* 7:102.
- Swanson GM, Burns PB. 1995. Cancer incidence among women in the workplace: a study of the association between occupation and industry and 11 cancer sites. *J. Occup. Environ. Med.* 37:282–7.
- Travier N, Gridley G, Roos AJ De, Plato N, Moradi T, Boffetta P. 2002. Cancer incidence of dry cleaning, laundry and ironing workers in Sweden. *Scand. J. Work. Environ. Health* 28:341–8.
- Walker JT, Burnett CA, Lalich NR, Sestito JP, Halperin WE. 1997. Cancer mortality among laundry and dry cleaning workers. *Am. J. Ind. Med.* 32:614–9.
- Wilson RT, Donahue M, Gridley G, Adami J, Ghormli L El, Dosemeci M. 2008. Shared occupational risks for transitional cell cancer of the bladder and renal pelvis among men and women in Sweden. *Am. J. Ind. Med.* 51:83–99.
